# The Religion of Fools?

## Superstition Past and Present

### CONTENTS

Introduction, 7

*S. A. Smith*

#### **Superstition in a Non-Christian Context**

Before Superstition and After: Theophrastus and Plutarch on *Deisidaimonia*, 56

*Hugh Bowden*

*Superstitio*, Superstition and Religious Repression in the Late Roman Republic and Principate (100 BCE–300 CE), 72

*Richard Gordon*

Superstition and its Others in Han China, 95

*T. H. Barrett*

#### **Superstition in Christendom**

Concern over Superstition in Late Medieval Europe, 115

*Michael D. Bailey*

‘Honeyed Flies’ and ‘Sugared Rats’: Witchcraft, Heresy, and Superstition in the Bresciano, 1454–1535, 134

*Stephen Bowd*

‘Superstition’, Magic, and Clerical Polemic in Seventeenth-Century Germany, 157

*Alison Rowlands*

Recording Superstition in Early Modern Britain: The Origins of Folklore, 178

*Alexandra Walsham*

Superstition in Imperial Russia, 207

*Simon Dixon*

#### **Superstition in the Modern World**

Superstition in Mexico: From Colonial Church to Secular State, 229

*Alan Knight*

*Mokoagne moni*: Sorcery and New Forms of Wealth in Cameroon, 271

*Basile Ndjio*

Imperial Secrets: Vampires and Nationhood in Puerto Rico, 290

*Lauren Derby*

Witchcraft and the State: Cameroon and South Africa. Ambiguities of ‘Reality’ and ‘Superstition’, 313

*Peter Geschiere*

List of Contributors, 336

**Index 337**
